# Supplementary material for: Canopy Size and Light Use Efficiency Explain Growth Differences between Lettuce and Mizuna in Vertical Farms
Source: MDPI journal article supplement (doi:10.3390/plants10040704), 2021-04-06
Supplement: s1 [file s1]

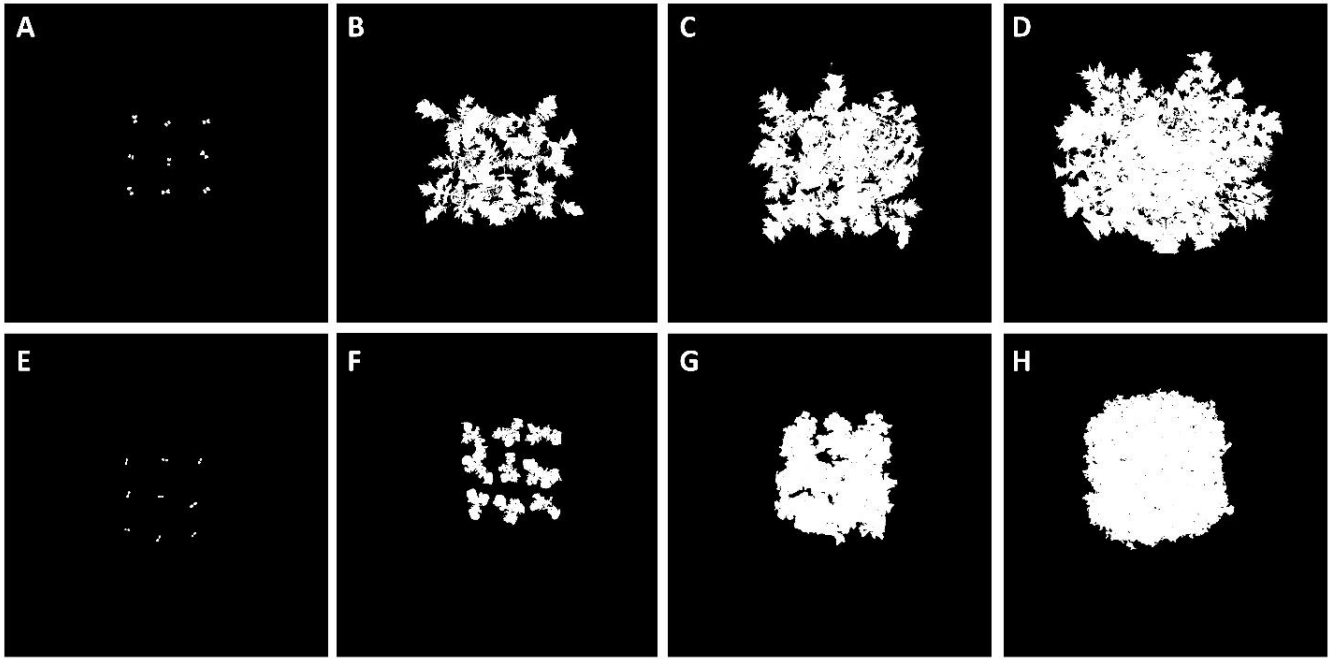

**Figure S1.** The projected canopy images captured during the growing period of mizuna (*Brassica rapa* var. *japonica*) (A–D) and lettuce (*Lactuca sativa* 'Green Salad Bowl') (E - H) grown at  $425 \mu\text{mol m}^{-2} \text{s}^{-1}$ . The first three images of mizuna (A–C) and lettuce (E–G) were captured at 5 (A, E), 15 (B, F), and 19 days (C, G) after seeding. The last image of mizuna (D) and lettuce (H) were captured during the harvest (27 and 28 days, respectively).

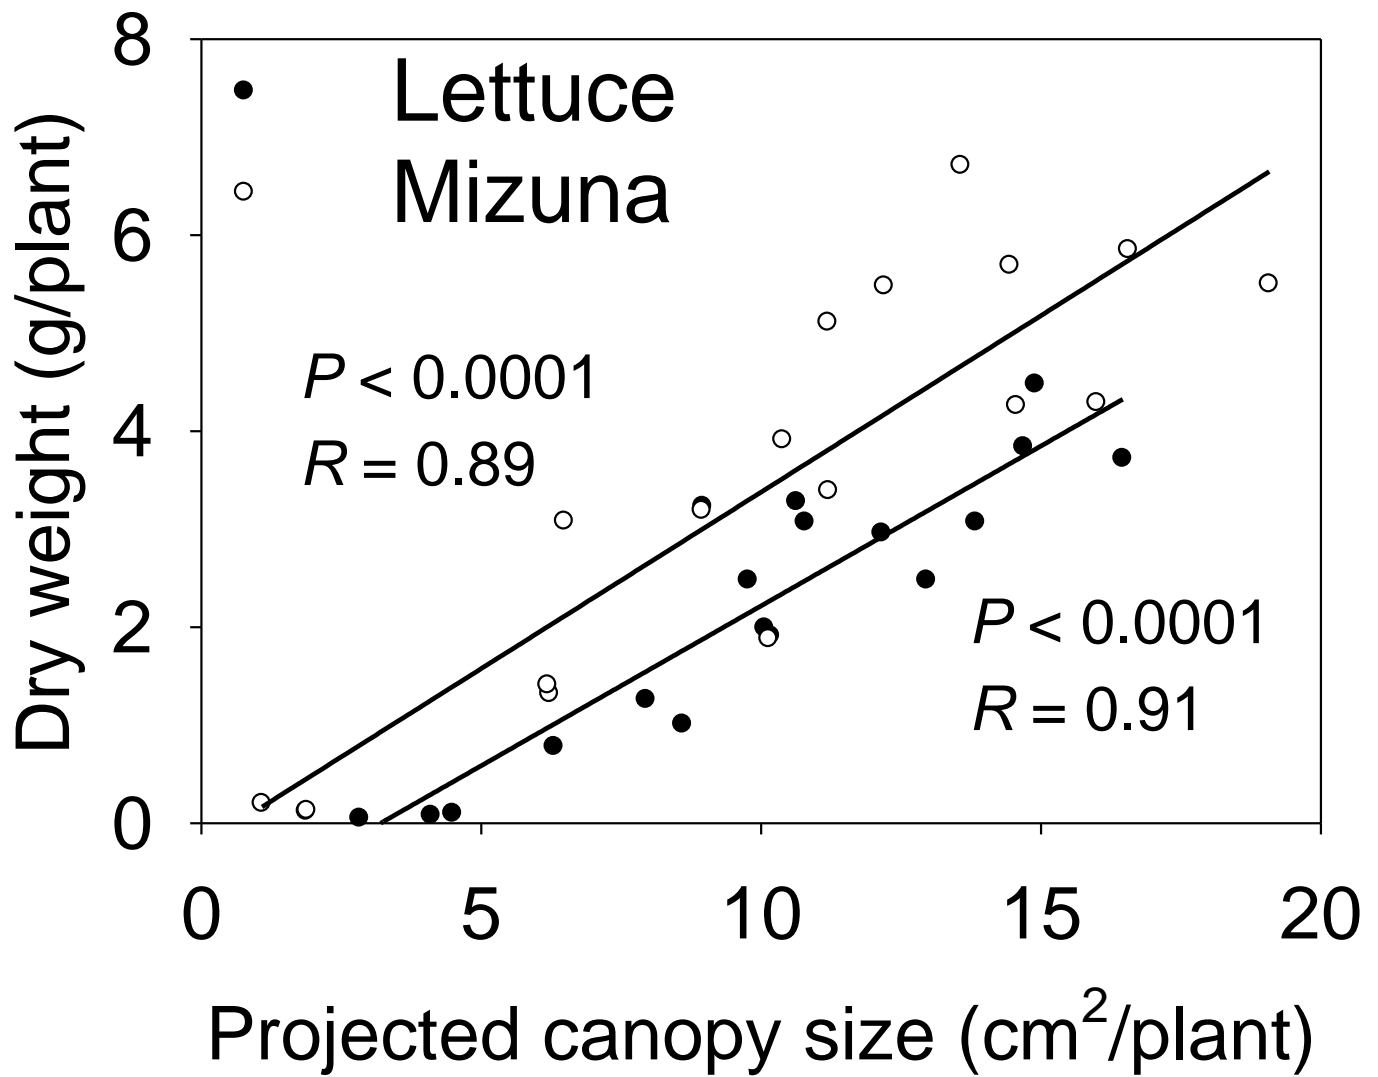

**Figure S2.** Correlation between early projected canopy size (lettuce at 10 days and mizuna at 8 days, after seeding) and final shoot dry weight of lettuce (*Lactuca sativa* 'Green Salad Bowl') and mizuna (*Brassica rapa* var. *japonica*).

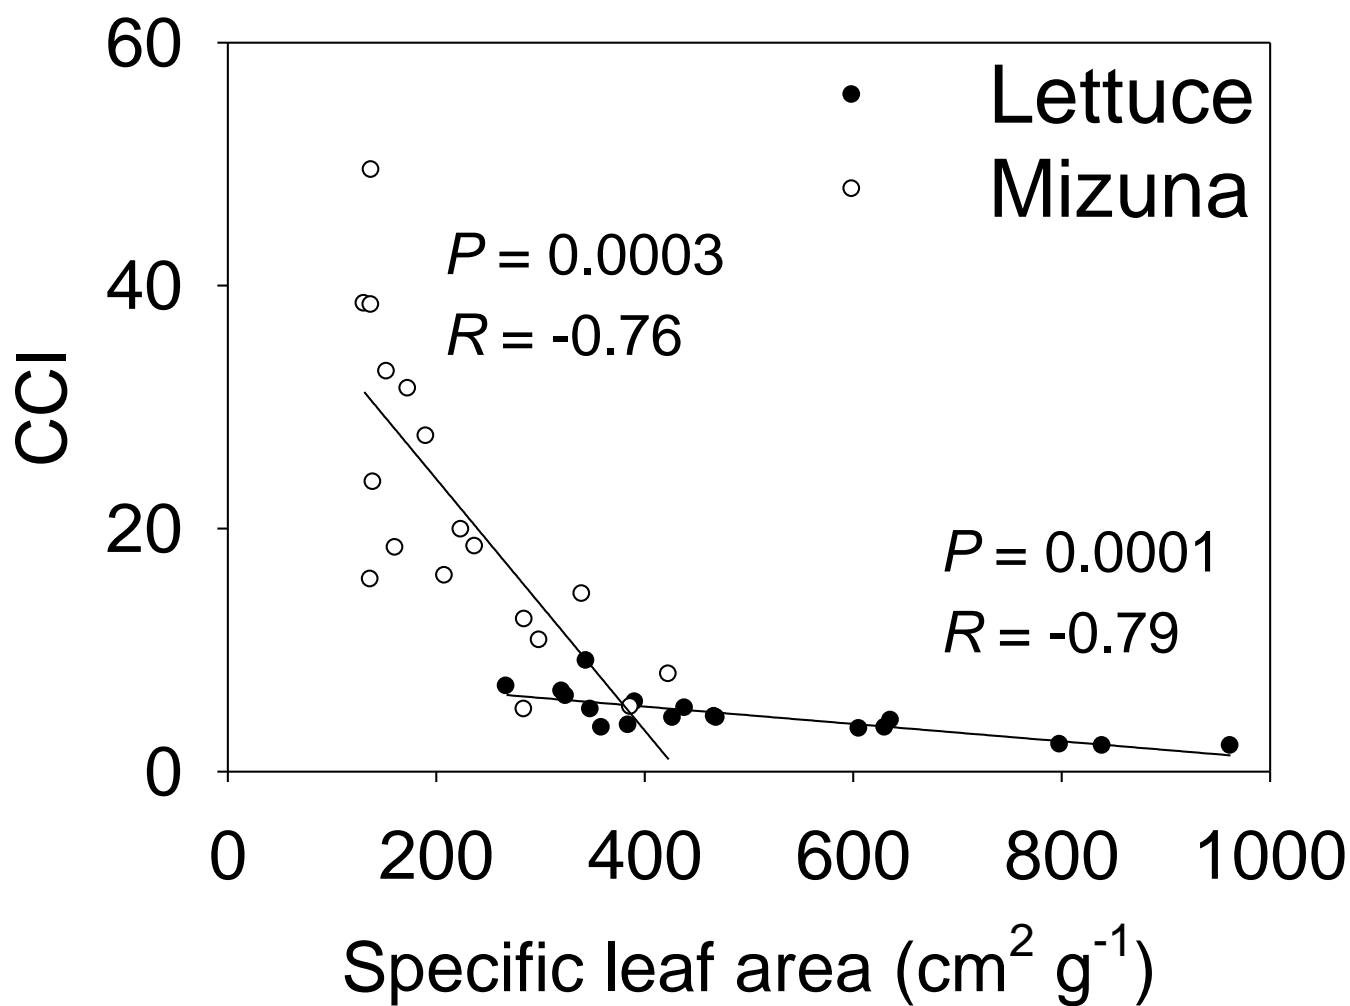

**Figure S3.** Correlation between specific leaf area (leaf area / shoot dry weight) and chlorophyll content index (CCI) of lettuce (*Lactuca sativa* 'Green Salad Bowl') and mizuna (*Brassica rapa* var. *japonica*).

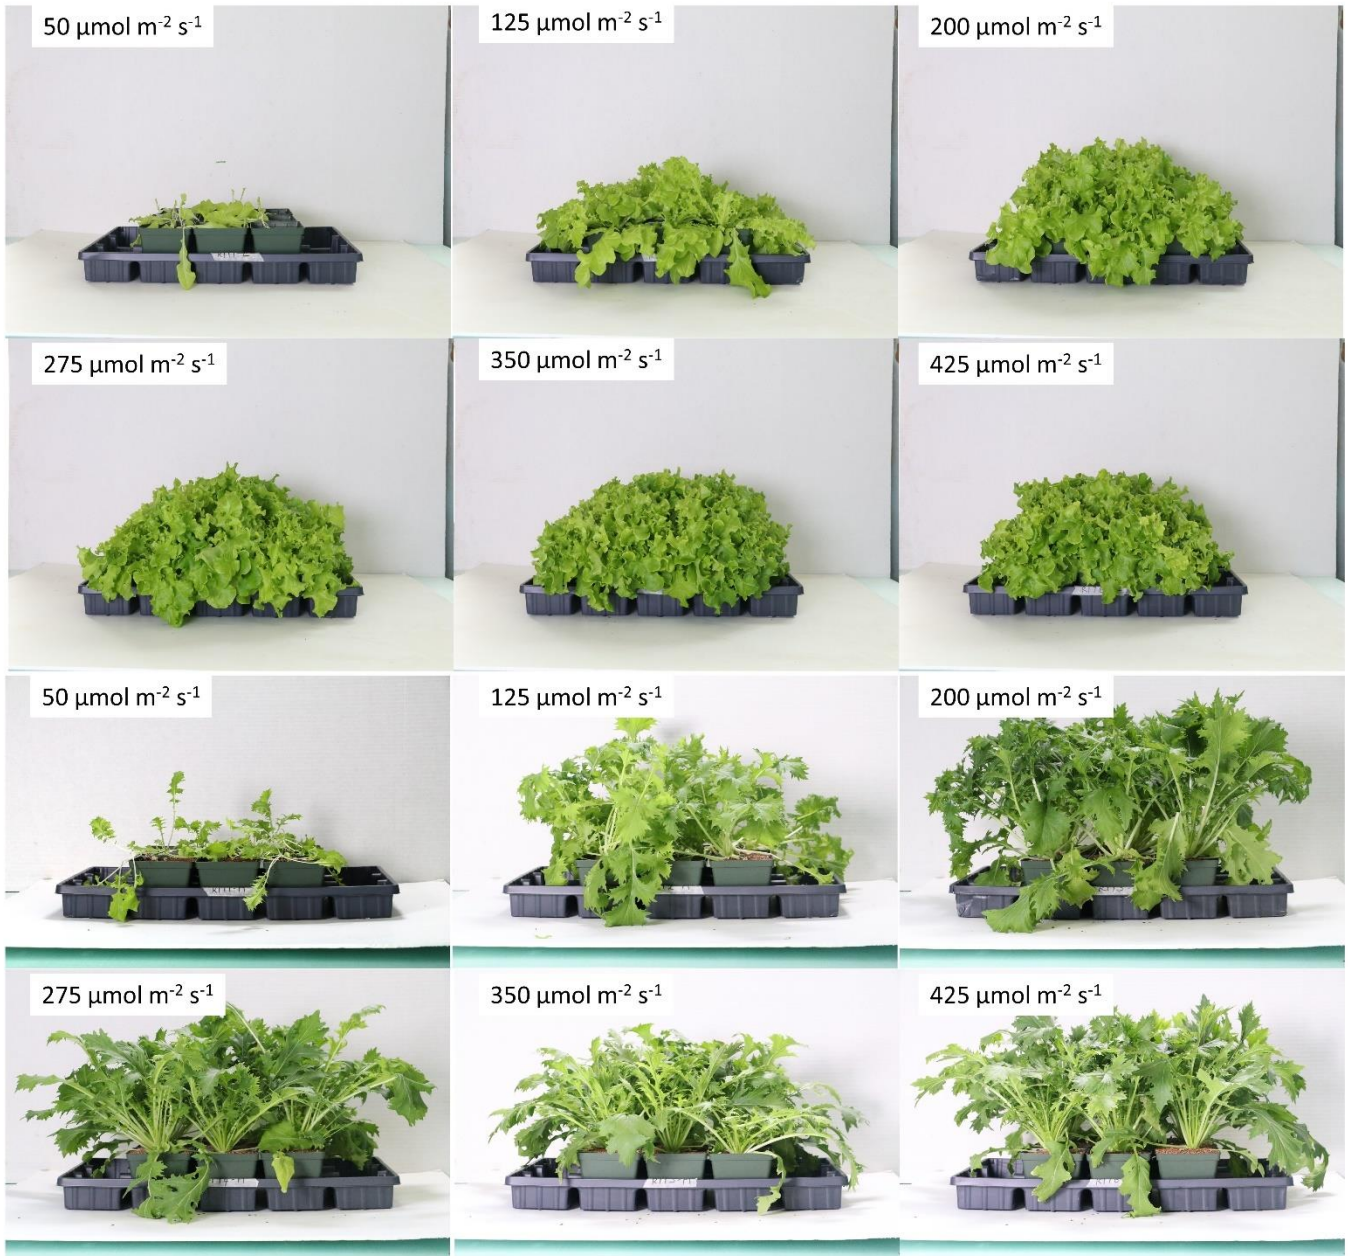

**Figure S4.** The appearance of lettuce (*Lactuca sativa* 'Green Salad Bowl', top) and mizuna (*Brassica rapa* var. *japonica*, bottom) at the end of the growing cycle for plants grown at six different photosynthetic photon flux densities (upper left corner of each picture).
